# Supplementary material for: Anti-Inflammatory Butenolides from a Marine-Derived Streptomyces sp. 13G036
Source: MDPI journal article supplement (doi:10.3390/app12094510), 2022-04-29
Supplement: s1 [file s1]

# Anti-inflammatory Butenolides from marine-derived *Streptomyces* sp 13G036

Ming Gao <sup>1,2,3</sup>, Sang Bong Lee <sup>4</sup>, Jae-Eon Lee <sup>4</sup>, Geum Jin Kim <sup>2,5</sup>, Jimin Moon <sup>2</sup>, Joo-Won Nam <sup>2</sup>,  
Jong-Sup Bae <sup>6</sup>, Jungwook Chin <sup>4</sup>, Yong Hyun Jeon <sup>7,\*</sup>, and Hyukjae Choi <sup>2,5,\*</sup>

<sup>1</sup> State Key Laboratory of Functions and Applications of Medicinal Plants, Guizhou Medical University, Guiyang, Guizhou 520000, China; [gaoming104@hotmail.com](mailto:gaoming104@hotmail.com) (M. G.)

<sup>2</sup> College of Pharmacy, Yeungnam University, Gyeongsan 38541, Korea; [canta87@ynu.ac.kr](mailto:canta87@ynu.ac.kr) (G.J.K.);  
[hyp1112@yu.ac.kr](mailto:hyp1112@yu.ac.kr) (J.M.); [jwnam@yu.ac.kr](mailto:jwnam@yu.ac.kr) (J.-W.N.)

<sup>3</sup> The Key Laboratory of Chemistry for Natural Products of Guizhou Province and Chinese Academy of Sciences, Guiyang, Guizhou 520000, China

<sup>4</sup> New Drug Development Center, Daegu-Gyeongbuk Medical Innovation Foundation (KMEDihub), Daegu 41061, Korea; [sangbong.yil@gmail.com](mailto:sangbong.yil@gmail.com) (S.B.L.); [jwchin@dgmif.re.kr](mailto:jwchin@dgmif.re.kr) (J.C.)

<sup>5</sup> Research Institute of Cell Culture, Yeungnam University, Gyeongsan 38541, Korea

<sup>6</sup> College of Pharmacy, CMRI, Research Institute of Pharmaceutical Sciences, BK21plus KNU Multi-Omics based Creative Drug Research Team, Kyungpook National University, Daegu 41566, Korea

<sup>7</sup> Laboratory Animal Center, KMEDihub, Daegu 41061, Korea

\*Correspondence: [jeon9014@dgmif.re.kr](mailto:jeon9014@dgmif.re.kr) (Y.H.J.); [h5choi@yu.ac.kr](mailto:h5choi@yu.ac.kr) (H.C.); Tel.: +82-53-200-3149 (Y.H.J.); +82-53-810-2824 (H.C.)

## *List of contents*

|                                                                                                                                                   |    |
|---------------------------------------------------------------------------------------------------------------------------------------------------|----|
| Table S1: Comparison of Chemical Shifts in $^{13}\text{C}$ NMR data and Specific Rotation of Synthesized Butenolides with <b>4</b> and <b>7</b> . | 3  |
| Figure S1: The picture of <i>Streptomyces</i> sp 13G036.                                                                                          | 4  |
| Figure S2: The assignment of functional group of compound <b>1</b> .                                                                              | 4  |
| Figure S3: $^1\text{H}$ NMR Spectrum of Compound <b>1</b> ( $\text{CDCl}_3$ , 250 MHz).                                                           | 5  |
| Figure S4: $^{13}\text{C}$ NMR Spectrum of Compound <b>1</b> ( $\text{CDCl}_3$ , 62.5 MHz).                                                       | 5  |
| Figure S5: COSY Spectrum of Compound <b>1</b> ( $\text{CDCl}_3$ , 250 MHz).                                                                       | 6  |
| Figure S6: HMQC Spectrum of Compound <b>1</b> ( $\text{CDCl}_3$ , 250 MHz).                                                                       | 6  |
| Figure S7: HMBC Spectrum of Compound <b>1</b> ( $\text{CDCl}_3$ , 250 MHz).                                                                       | 7  |
| Figure S8: HR-FAB-MS Data of Compound <b>1</b> .                                                                                                  | 7  |
| Figure S9: LR-ESI-MS Data of Compound <b>2</b> .                                                                                                  | 8  |
| Figure S10: $^1\text{H}$ NMR Spectrum of Compound <b>2</b> ( $\text{CDCl}_3$ , 250 MHz).                                                          | 8  |
| Figure S11: $^{13}\text{C}$ NMR Spectrum of Compound <b>2</b> ( $\text{CDCl}_3$ , 62.5 MHz).                                                      | 9  |
| Figure S12: LR-ESI-MS Data of Compound <b>3</b> .                                                                                                 | 9  |
| Figure S13: $^1\text{H}$ NMR Spectrum of Compound <b>3</b> ( $\text{CDCl}_3$ , 250 MHz).                                                          | 10 |
| Figure S14: $^{13}\text{C}$ NMR Spectrum of Compound <b>3</b> ( $\text{CDCl}_3$ , 62.5 MHz).                                                      | 10 |
| Figure S15: LR-ESI-MS Data of Compound <b>4</b> .                                                                                                 | 11 |
| Figure S16: $^1\text{H}$ NMR Spectrum of Compound <b>4</b> ( $\text{CDCl}_3$ , 250 MHz).                                                          | 11 |
| Figure S17: $^{13}\text{C}$ NMR Spectrum of Compound <b>4</b> ( $\text{CDCl}_3$ , 62.5 MHz).                                                      | 12 |
| Figure S18: LR-ESI-MS Data of Compound <b>5</b> .                                                                                                 | 12 |
| Figure S19: $^1\text{H}$ NMR Spectrum of Compound <b>5</b> ( $\text{CDCl}_3$ , 250 MHz).                                                          | 13 |
| Figure S20: $^{13}\text{C}$ NMR Spectrum of Compound <b>5</b> ( $\text{CDCl}_3$ , 62.5 MHz).                                                      | 13 |
| Figure S21: LR-ESI-MS Data of Compound <b>6</b> .                                                                                                 | 14 |
| Figure S22: $^1\text{H}$ NMR Spectrum of Compound <b>6</b> ( $\text{CDCl}_3$ , 250 MHz).                                                          | 14 |
| Figure S23: $^{13}\text{C}$ NMR Spectrum of Compound <b>6</b> ( $\text{CDCl}_3$ , 62.5 MHz).                                                      | 15 |
| Figure S24: LR-ESI-MS data of Compound <b>7</b> .                                                                                                 | 15 |
| Figure S25: $^1\text{H}$ NMR Spectrum of Compound <b>7</b> ( $\text{CDCl}_3$ , 250 MHz).                                                          | 16 |
| Figure S26: $^{13}\text{C}$ NMR Spectrum of Compound <b>7</b> ( $\text{CDCl}_3$ , 62.5 MHz).                                                      | 16 |

Table S1: Comparison of Chemical Shifts in  $^{13}\text{C}$  NMR data and Specific Rotation of Synthesized Butenolides with **4** and **7**.

| No                       | synthetic<br>4 <i>S</i> ,10 <i>S</i> ,11 <i>R</i> | synthetic<br>4 <i>S</i> ,10 <i>R</i> ,11 <i>S</i> | <b>4</b> | synthetic<br>4 <i>S</i> ,10 <i>S</i> ,11 <i>S</i> | synthetic<br>4 <i>S</i> ,10 <i>R</i> ,11 <i>R</i> | <b>7</b> |
|--------------------------|---------------------------------------------------|---------------------------------------------------|----------|---------------------------------------------------|---------------------------------------------------|----------|
| <b>1</b>                 | 173.19                                            | 173.19                                            | 173.13   | 173.17                                            | 173.15                                            | 173.20   |
| <b>2</b>                 | 121.55                                            | 121.54                                            | 121.59   | 121.58                                            | 121.57                                            | 121.60   |
| <b>3</b>                 | 126.30                                            | 156.30                                            | 156.22   | 156.26                                            | 156.23                                            | 156.20   |
| <b>4</b>                 | 83.41                                             | 83.41                                             | 83.39    | 83.39                                             | 83.38                                             | 83.40    |
| <b>5</b>                 | 33.16                                             | 33.15                                             | 33.19    | 33.17                                             | 33.16                                             | 33.21    |
| <b>6</b>                 | 24.97                                             | 24.95                                             | 24.97    | 24.97                                             | 24.97                                             | 25.00    |
| <b>7</b>                 | 29.60                                             | 29.60                                             | 29.63    | 29.61                                             | 29.60                                             | 29.65    |
| <b>8</b>                 | 26.99                                             | 26.98                                             | 27.01    | 27.13                                             | 27.12                                             | 27.16    |
| <b>9</b>                 | 32.35                                             | 32.34                                             | 32.36    | 32.42                                             | 32.42                                             | 32.48    |
| <b>10</b>                | 39.99                                             | 39.97                                             | 40.01    | 39.69                                             | 39.67                                             | 39.73    |
| <b>11</b>                | 71.72                                             | 71.70                                             | 71.74    | 71.33                                             | 71.31                                             | 71.34    |
| <b>12</b>                | 19.51                                             | 19.49                                             | 19.54    | 20.27                                             | 20.26                                             | 20.32    |
| <b>13</b>                | 14.58                                             | 14.57                                             | 14.61    | 14.11                                             | 14.11                                             | 14.15    |
|                          |                                                   |                                                   |          |                                                   |                                                   |          |
|                          | 4 <i>S</i> ,10 <i>S</i> ,11 <i>R</i>              | 4 <i>S</i> ,10 <i>R</i> ,11 <i>S</i>              | <b>4</b> | 4 <i>S</i> ,10 <i>S</i> ,11 <i>S</i>              | 4 <i>S</i> ,10 <i>R</i> ,11 <i>R</i>              | <b>7</b> |
| <b>Specific rotation</b> | +42.9                                             | +70.9                                             | +65.8    | +33.6                                             | +64.3                                             | +35.6    |

Same symbol means same configurations.

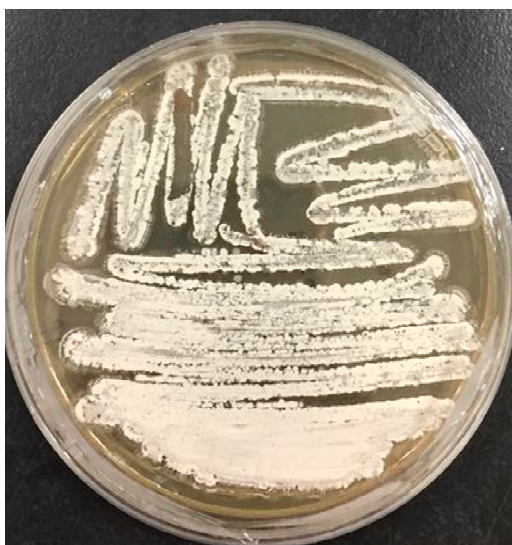

Figure S1: The picture of *Streptomyces* sp 13G036.

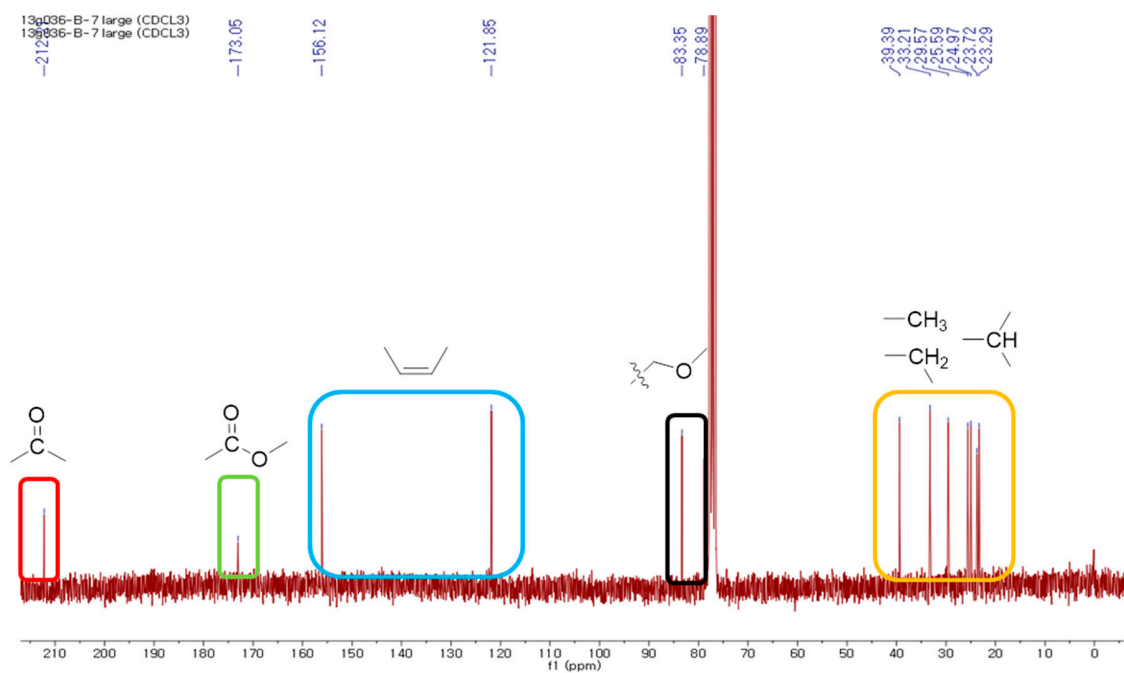

Figure S2: The assignment of functional group of compound **1**.

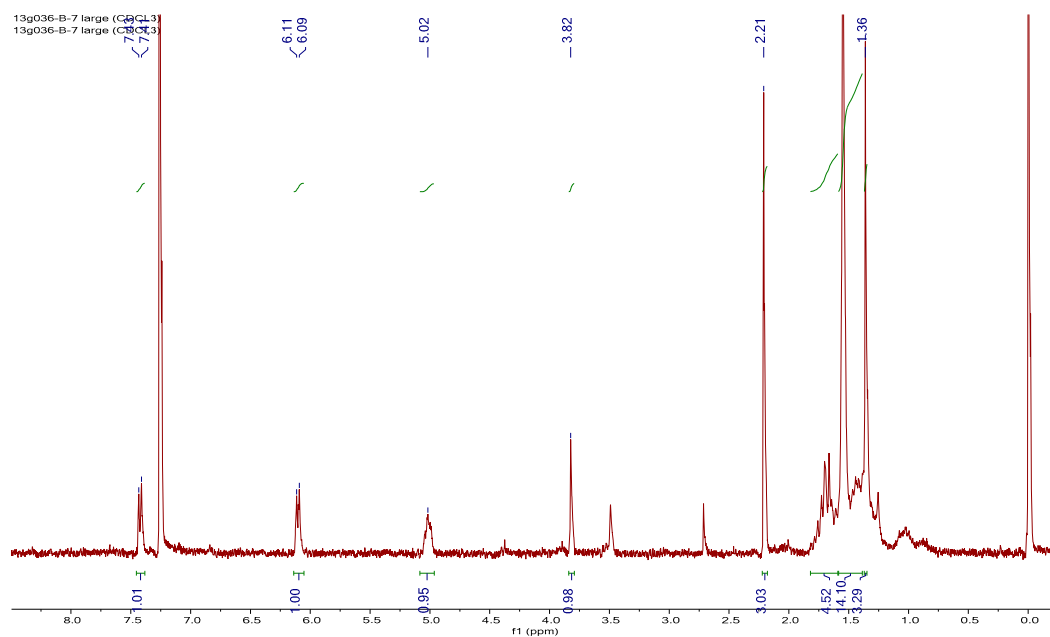

Figure S3: <sup>1</sup>H NMR Spectrum of Compound **1** (CDCl<sub>3</sub>, 250 MHz)

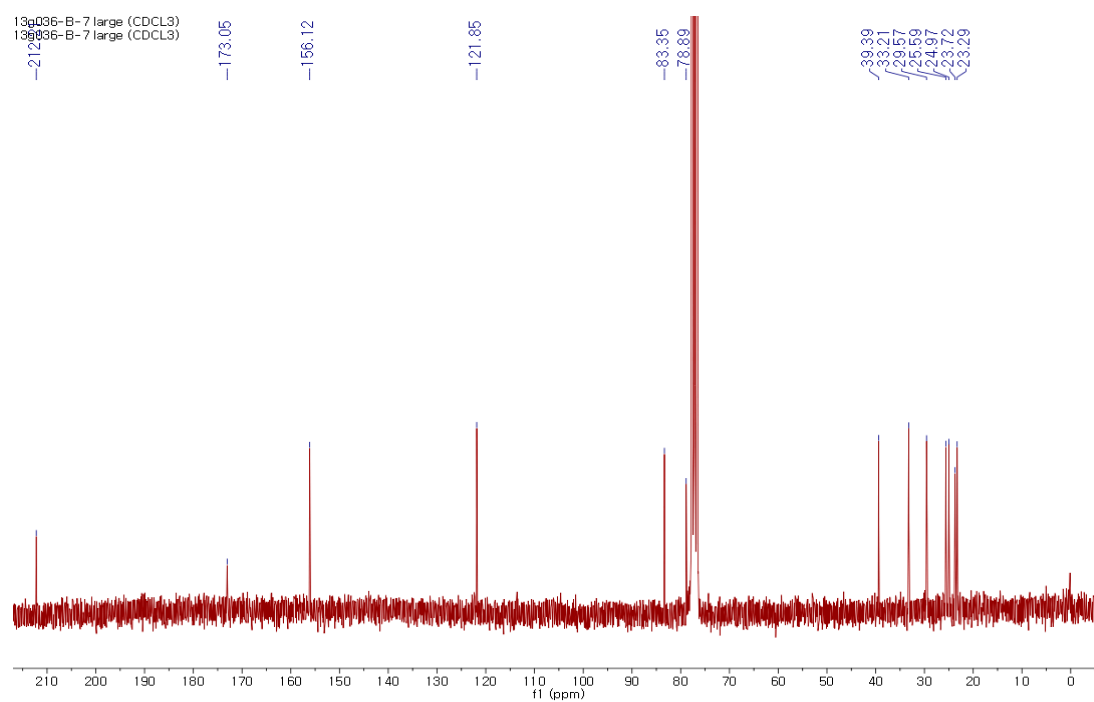

Figure S4: <sup>13</sup>C NMR Spectrum of Compound **1** (CDCl<sub>3</sub>, 62.5 MHz)

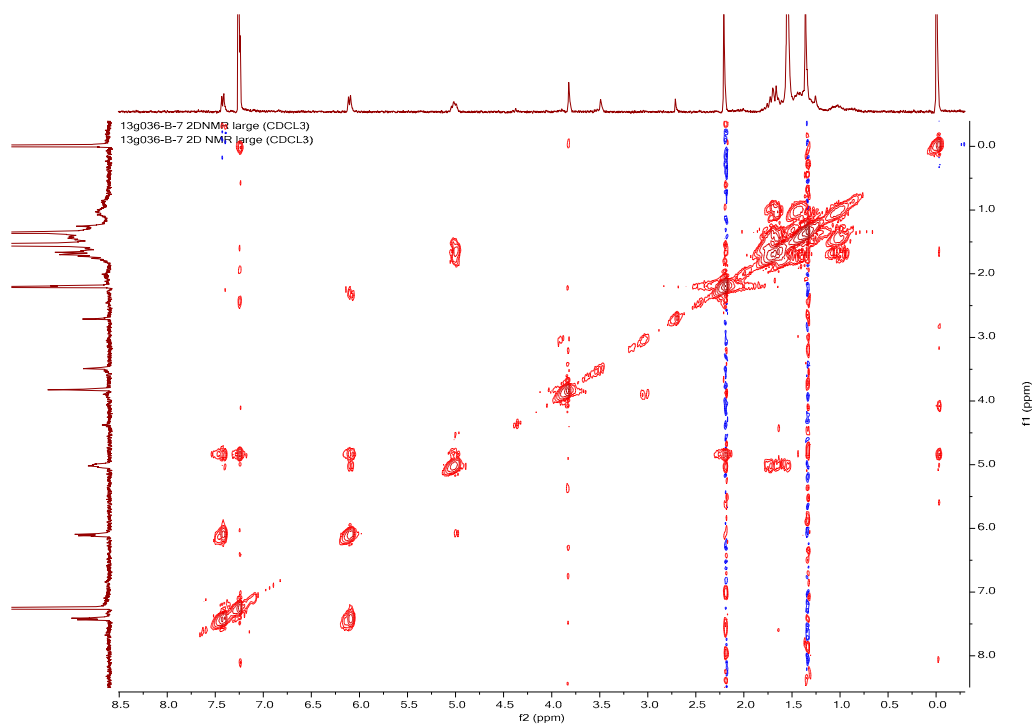

Figure S5: COSY Spectrum of Compound **1** (CDCl<sub>3</sub>, 250 MHz)

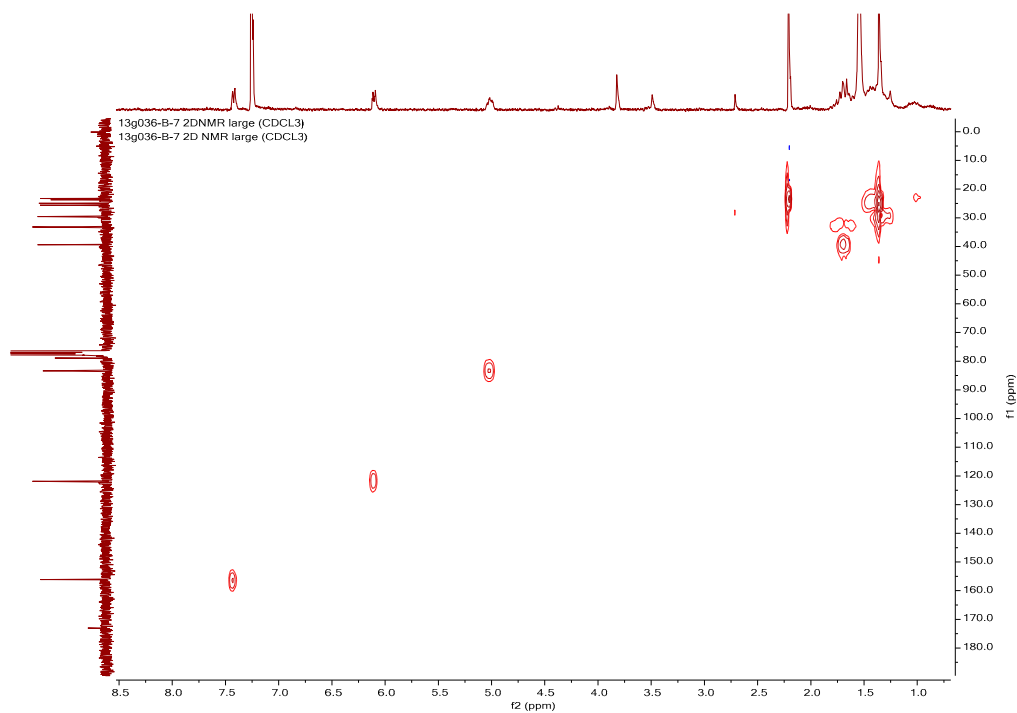

Figure S6: HMBC Spectrum of Compound **1** (CDCl<sub>3</sub>, 250 MHz)

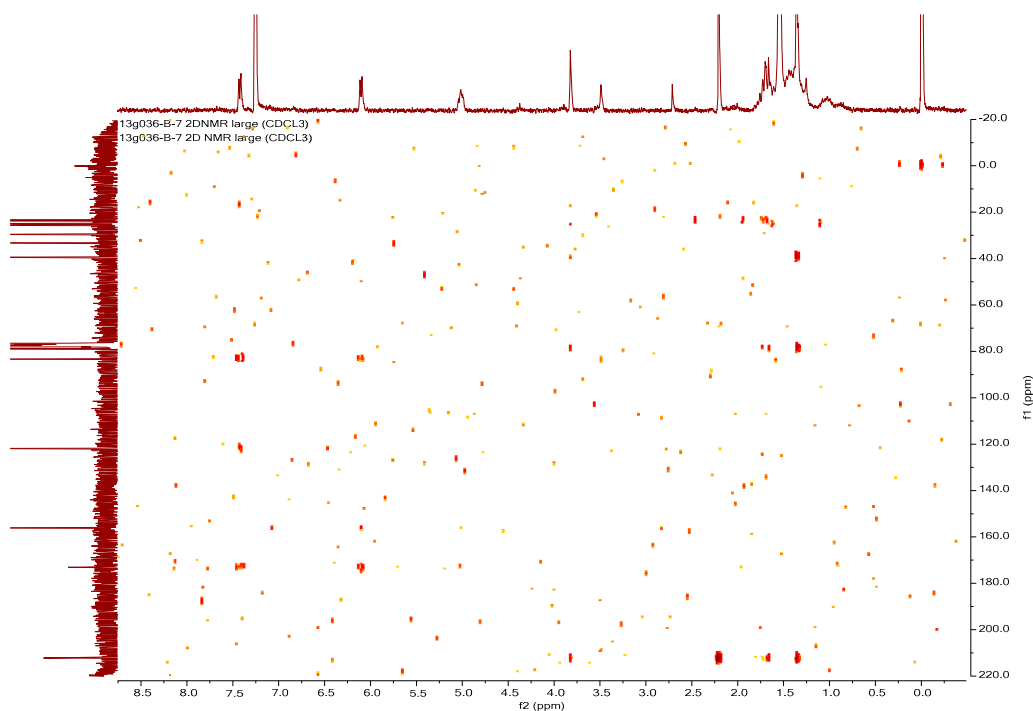

Figure S7: HMBC Spectrum of Compound **1** (CDCl<sub>3</sub>, 250 MHz)

[ Elemental Composition ]  
 Data : FAB-R084  
 Sample: 13G036-B-'/  
 Note : m-NBA  
 Inlet : Direct  
 RT : 0.18 min  
 Elements : C 100/0, H 100/0, N 10/0, O 10/0  
 Mass Tolerance : 20ppm, 5mmu if m/z < 250, 10mmu if m/z > 500  
 Unsaturation (U.S.) : -0.5 - 50.0

Date : 19-Jul-2018 11:23

Page: 1

[ Theoretical Ion Distribution ]  
 Molecular Formula : C13 H21 O4  
 (m/z 241.1440, MW 241.3073, U.S. 3.5)  
 Base Peak : 241.1440, Averaged MW : 241.3050(a), 241.3058(w)

Page: 1

| m/z      | INT.           |
|----------|----------------|
| 241.1440 | 100.0000 ***** |
| 242.1473 | 14.6114 *****  |
| 243.1496 | 1.7889 *       |
| 244.1522 | 0.1577         |
| 245.1547 | 0.0114         |
| 246.1572 | 0.0007         |

Figure S8: HR-FAB-MS Data of Compound **1**

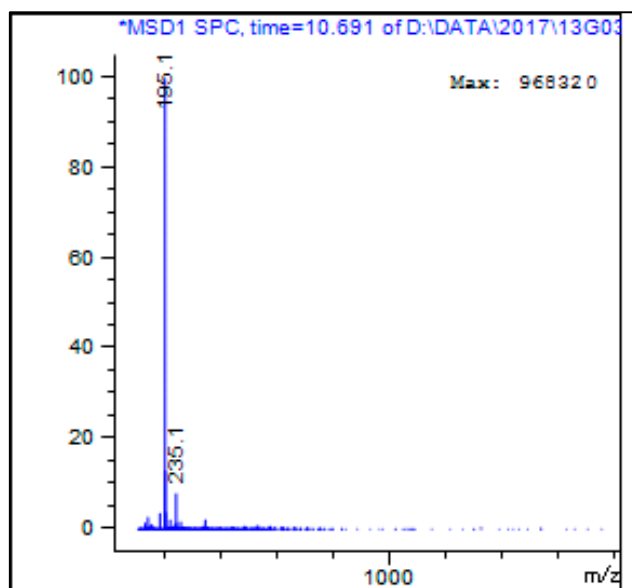

Figure S9: LR-ESI-MS Data of Compound **2**

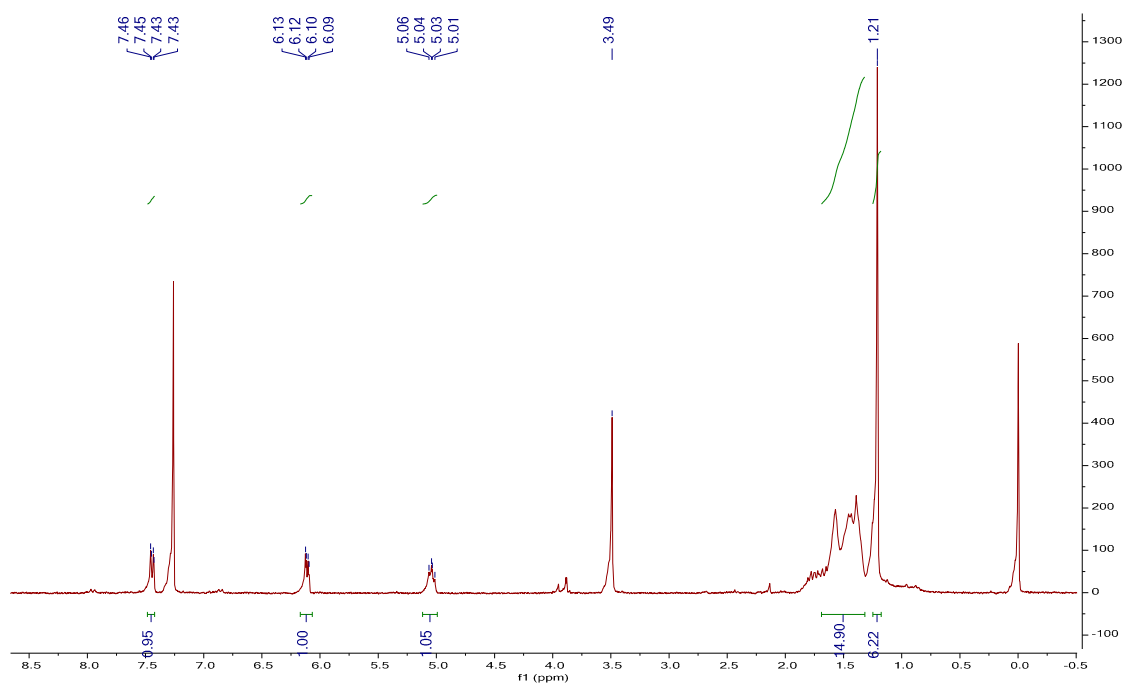

Figure S10:  $^1\text{H}$  NMR Spectrum of Compound **2** ( $\text{CDCl}_3$ , 250 MHz)



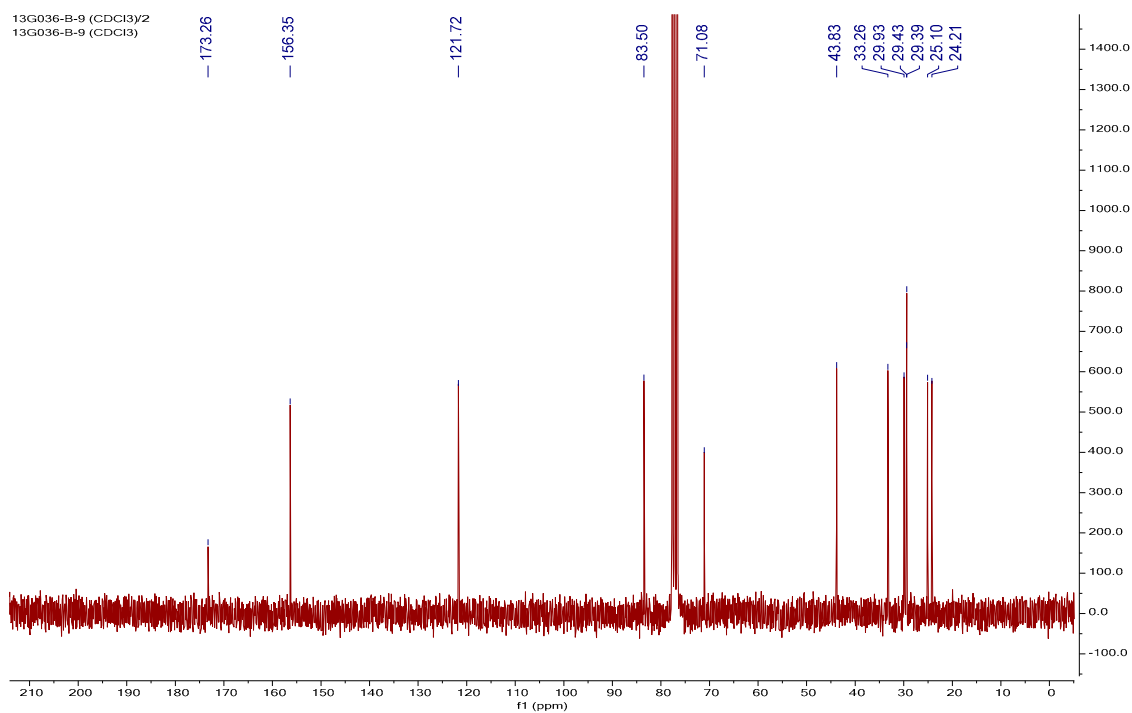

Figure S11: <sup>13</sup>C NMR Spectrum of Compound **2** (CDCl<sub>3</sub>, 62.5 MHz)

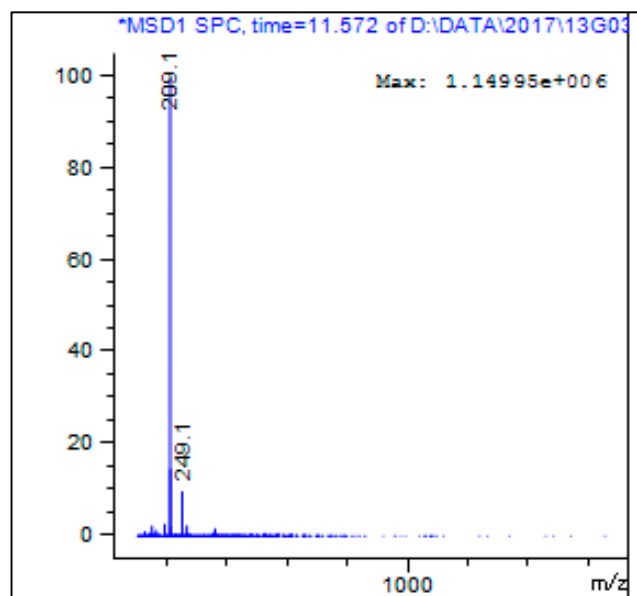

Figure S12: LR-ESI-MS Data of Compound **3**

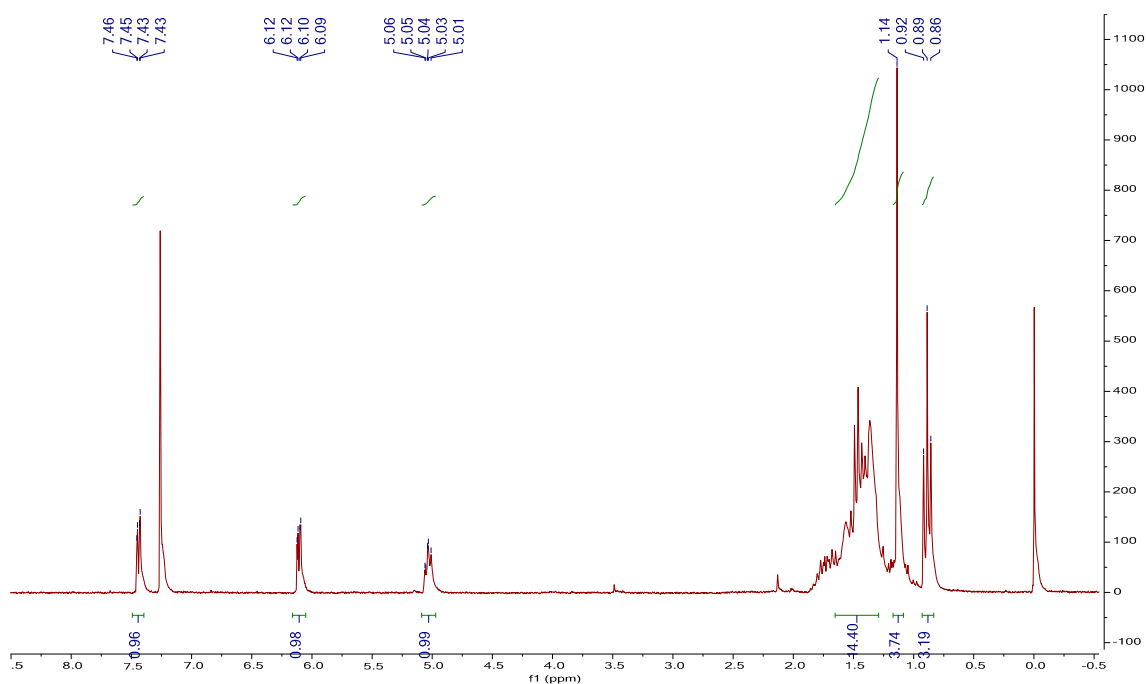

Figure S13: <sup>1</sup>H NMR Spectrum of Compound **3** (CDCl<sub>3</sub>, 250 MHz)

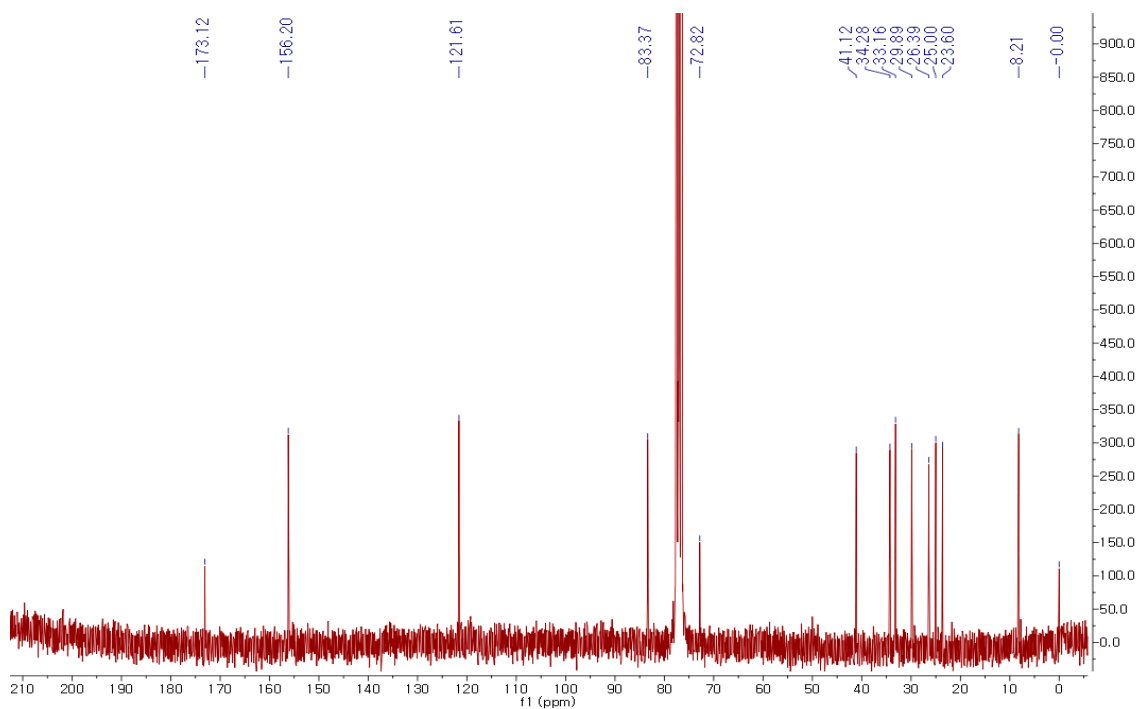

Figure S14: <sup>13</sup>C NMR Spectrum of Compound **3** (CDCl<sub>3</sub>, 62.5 MHz)

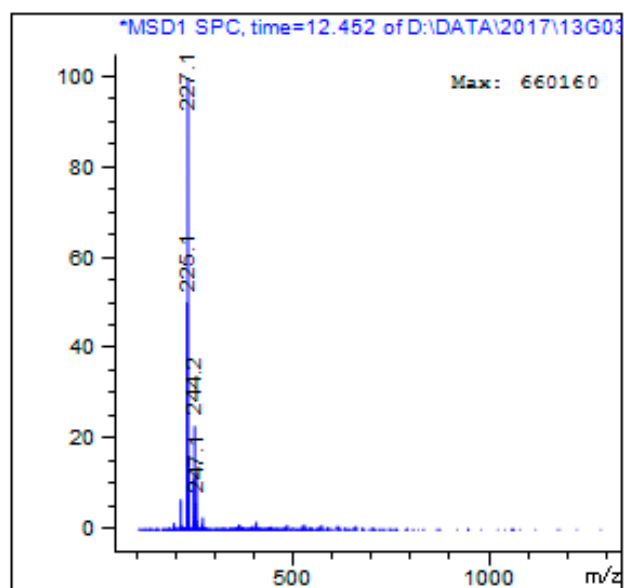

Figure S15: LR-ESI-MS Data of Compound **4**

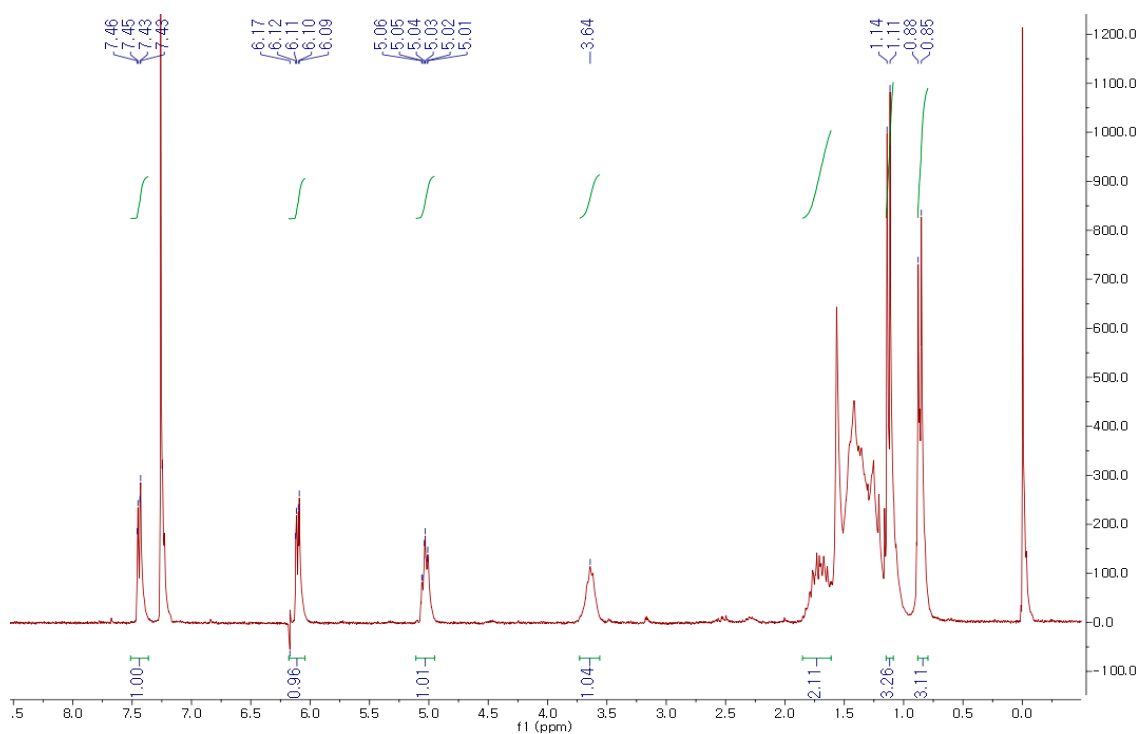

Figure S16: <sup>1</sup>H NMR Spectrum of Compound **4** (CDCl<sub>3</sub>, 250 MHz)

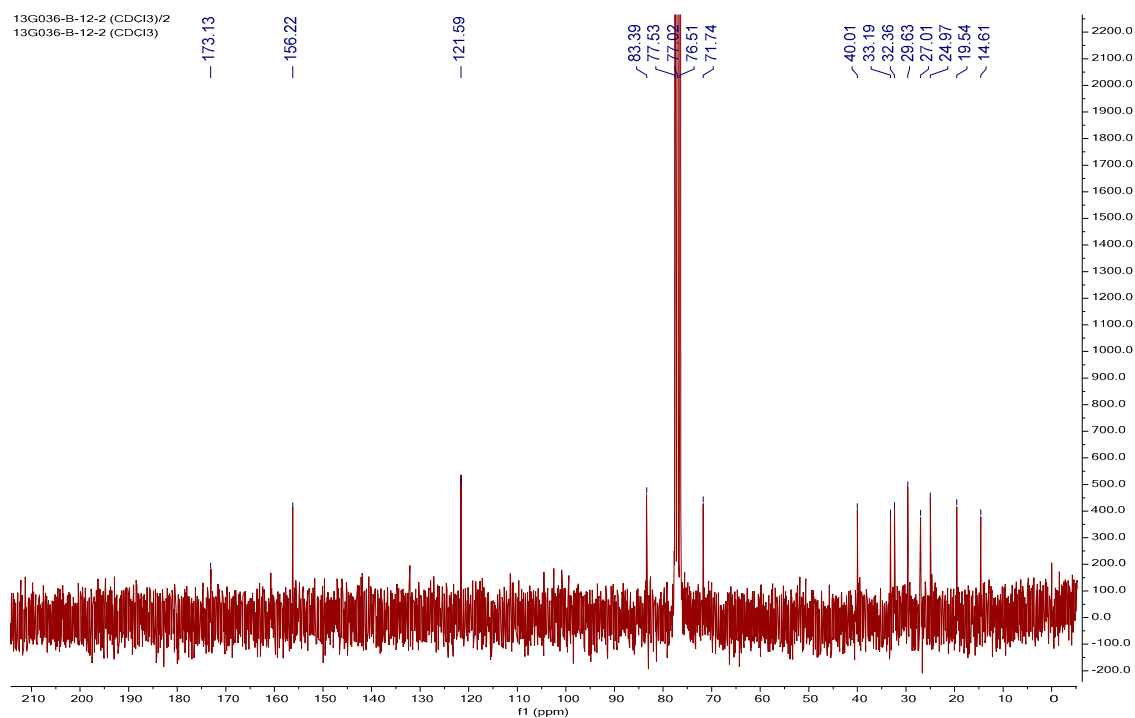

Figure S17:  $^{13}\text{C}$  NMR Spectrum of Compound **4** ( $\text{CDCl}_3$ , 62.5 MHz)

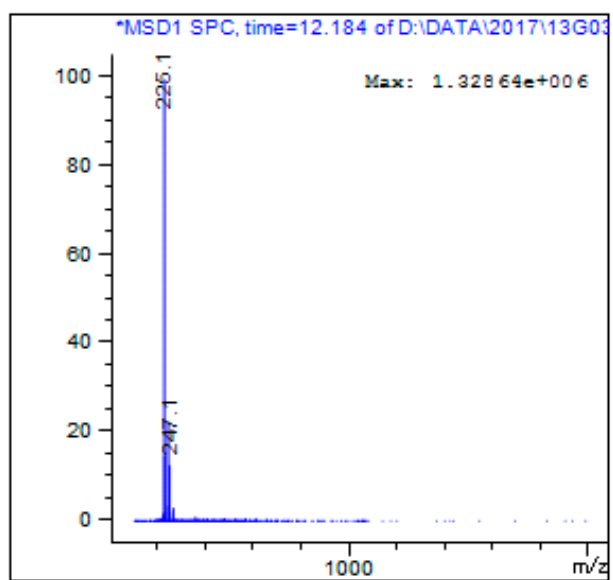

Figure S18: LR-ESI-MS Data of Compound **5**

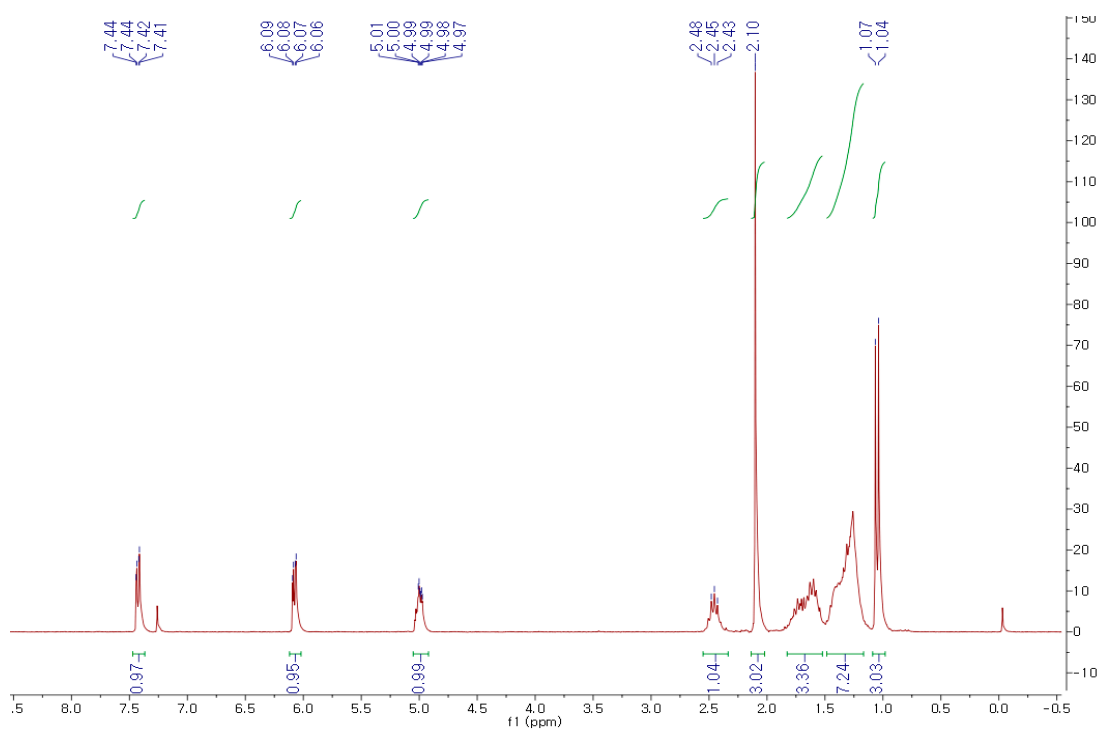

Figure S19: <sup>1</sup>H NMR Spectrum of Compound **5** (CDCl<sub>3</sub>, 250 MHz)

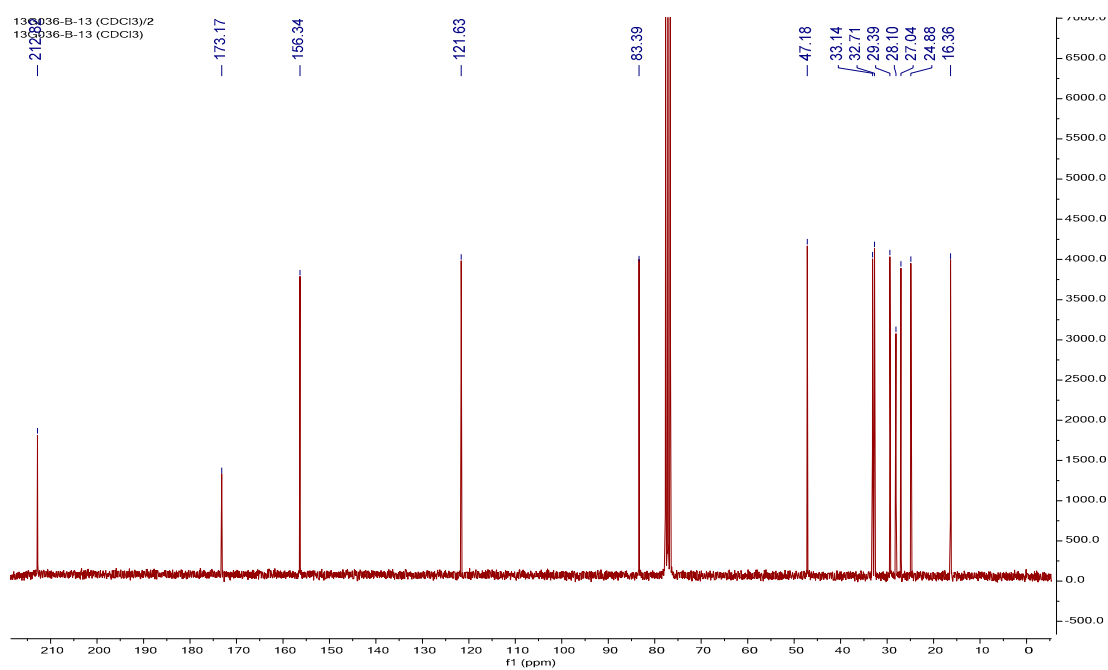

Figure S20: <sup>13</sup>C NMR Spectrum of Compound **5** (CDCl<sub>3</sub>, 62.5 MHz)

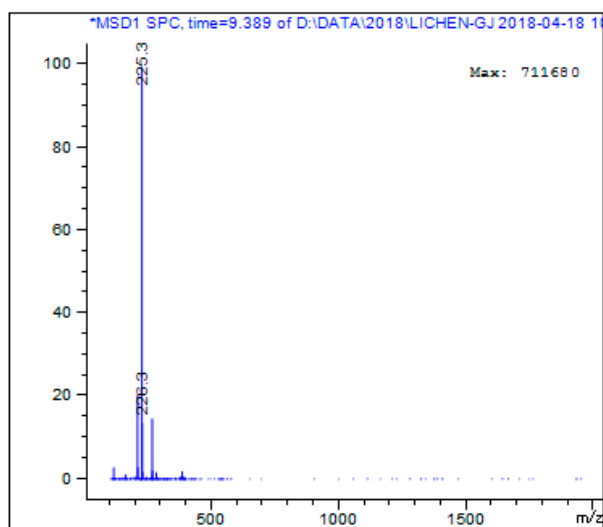

Figure S21: LR-ESI-MS Data of Compound **6**

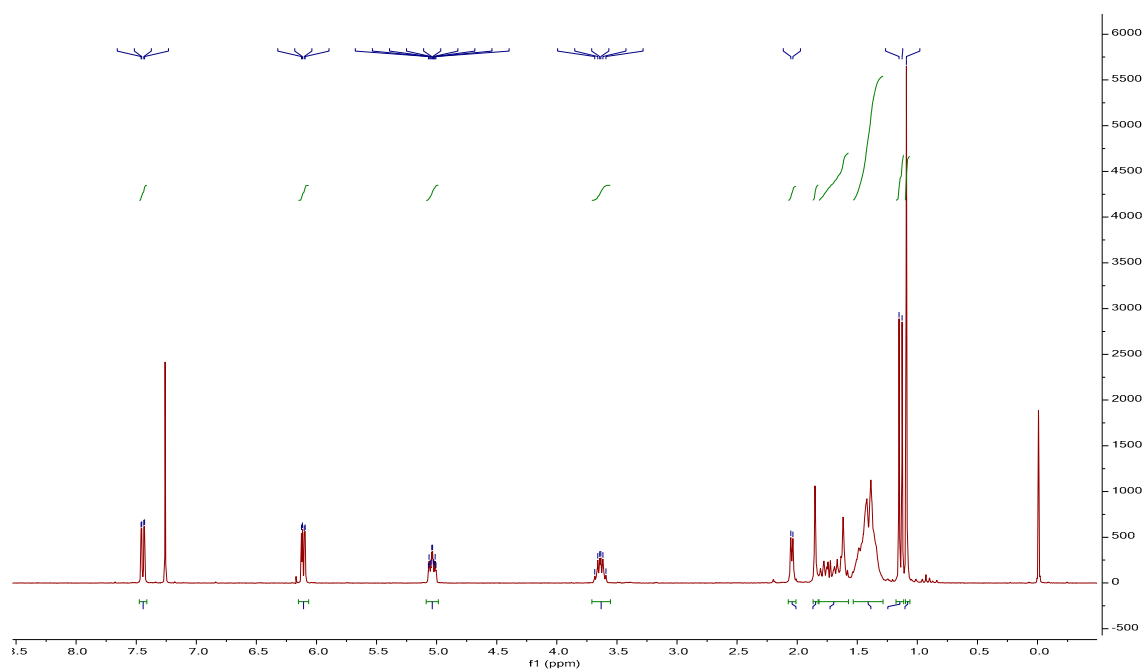

Figure S22: <sup>1</sup>H NMR Spectrum of Compound **6** (CDCl<sub>3</sub>, 250 MHz)

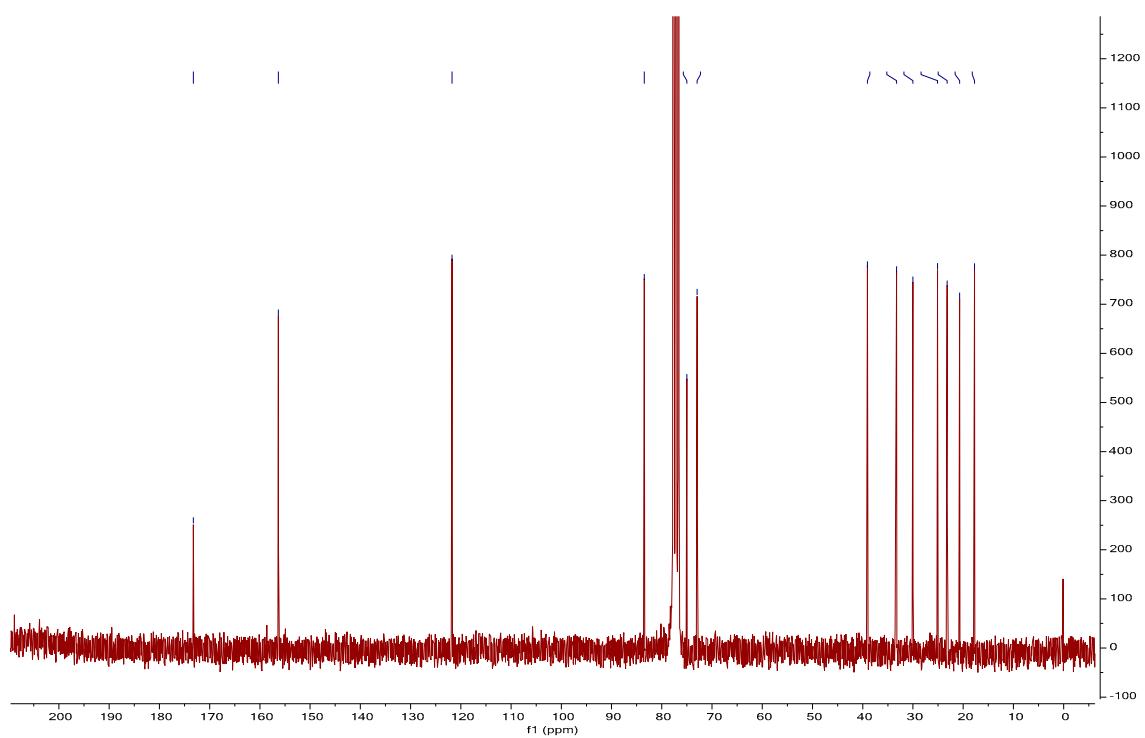

Figure S23:  $^{13}\text{C}$  NMR Spectrum of Compound **6** ( $\text{CDCl}_3$ , 62.5 MHz)

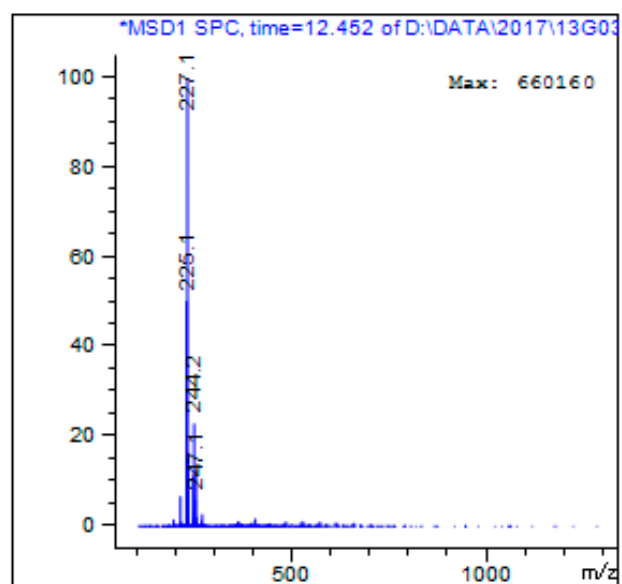

Figure S24: LR-ESI-MS data of Compound **7**

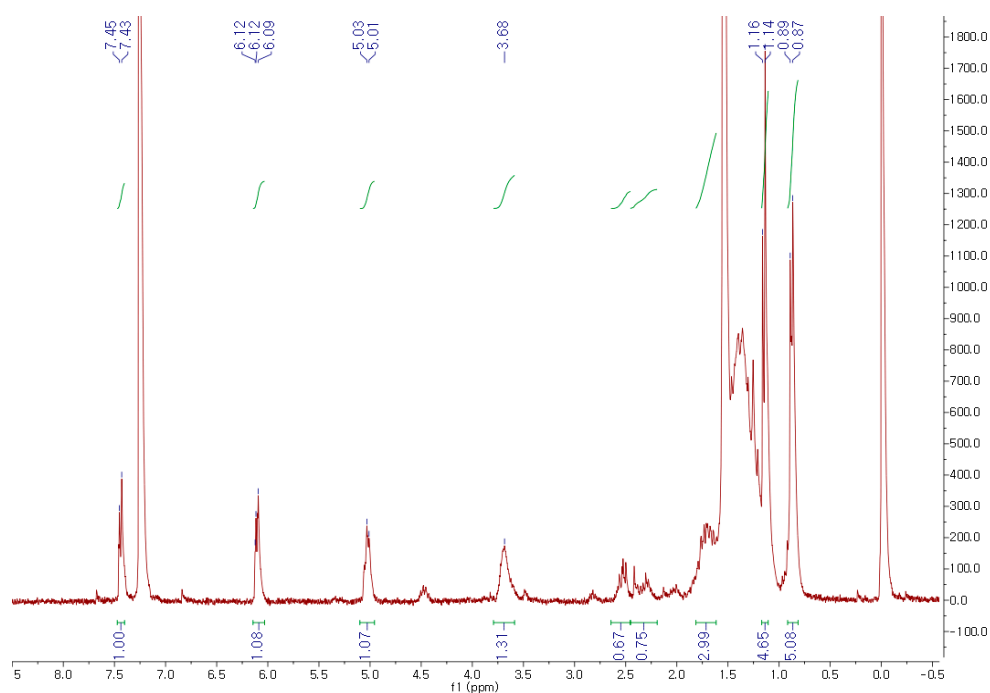

Figure S25: <sup>1</sup>H NMR Spectrum of Compound 7 (CDCl<sub>3</sub>, 250 MHz)

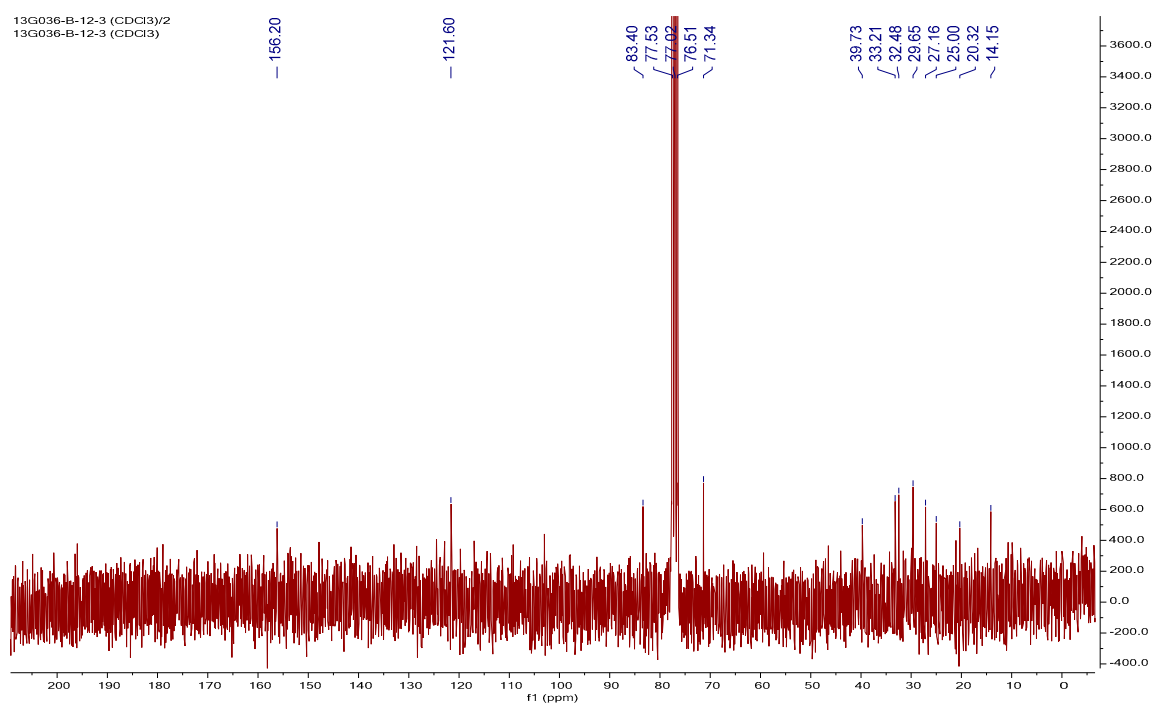

Figure S26: <sup>13</sup>C NMR Spectrum of Compound 7 (CDCl<sub>3</sub>, 62.5 MHz)
